# Supplementary figures and images for: Beta-Caryophyllene Enhances the Anti-Tumor Activity of Cisplatin in Lung Cancer Cell Lines through Regulating Cell Cycle and Apoptosis Signaling Molecules
Source: MDPI journal article supplement (doi:10.3390/molecules27238354), 2022-11-30

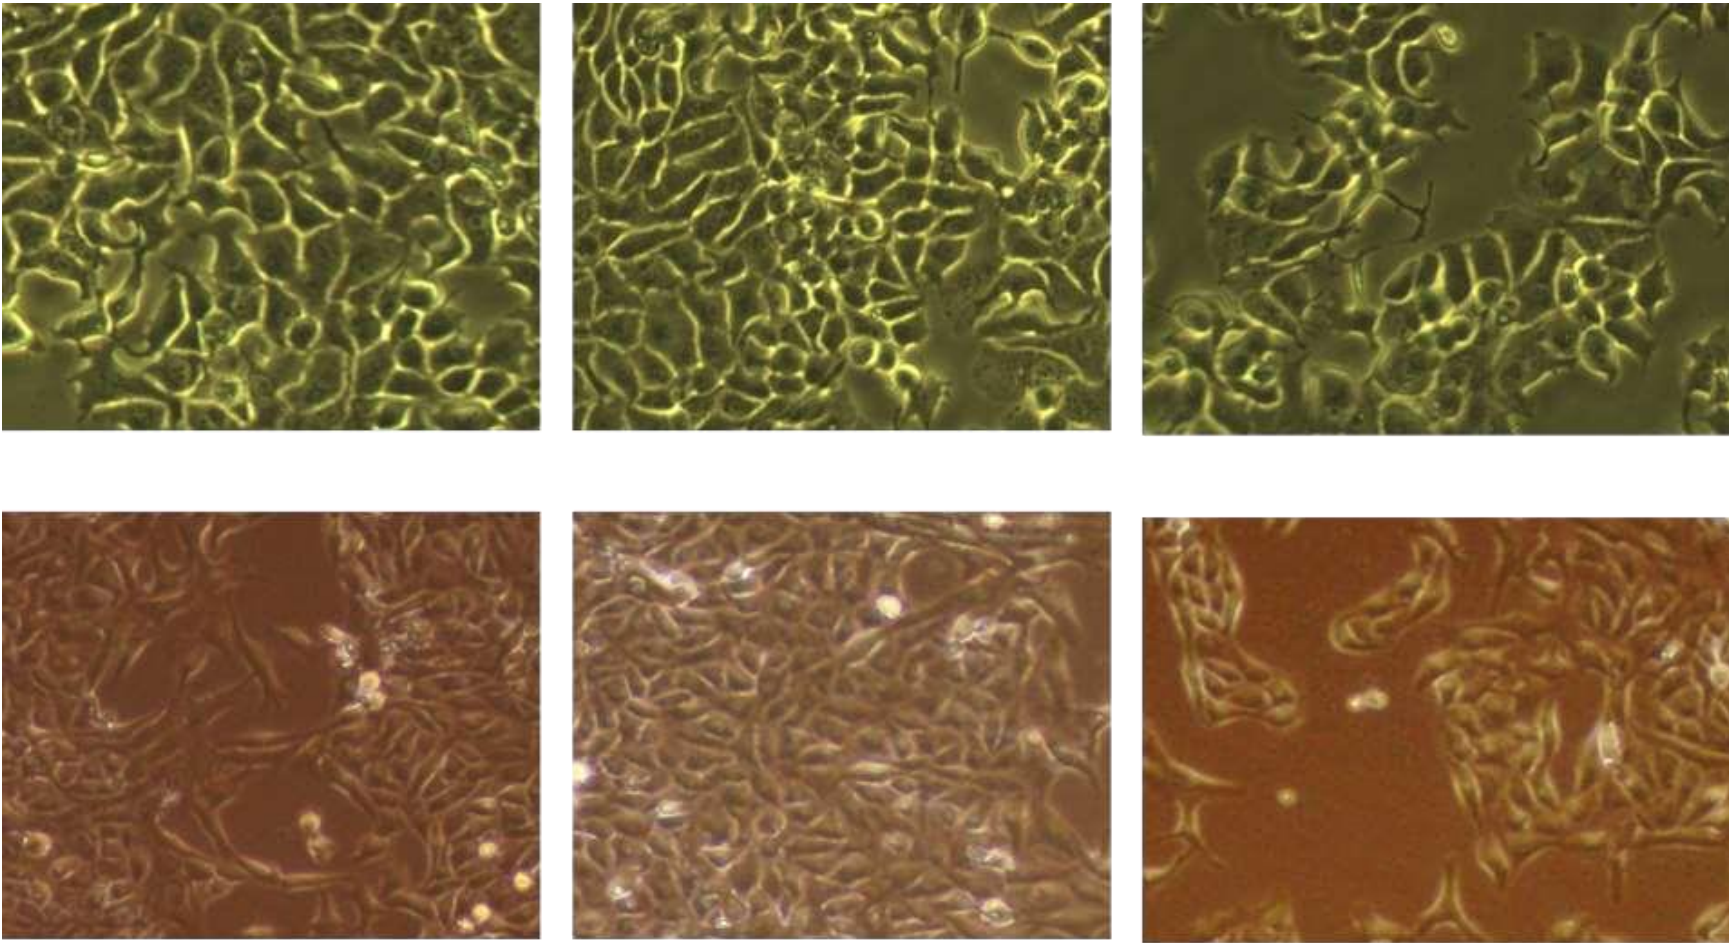

Images for A549 and Beas

**Figure S1.** Cell lines images.

Supplement: s1 [file s1]
